# Supplementary material
Source: publisher figshare collection journal article supplement (https://diabetesjournals.figshare.com/ndownloader/files/29824254)
Supplement: Supplementary file 1 [file 29824254]

Supplementary Figure: 1

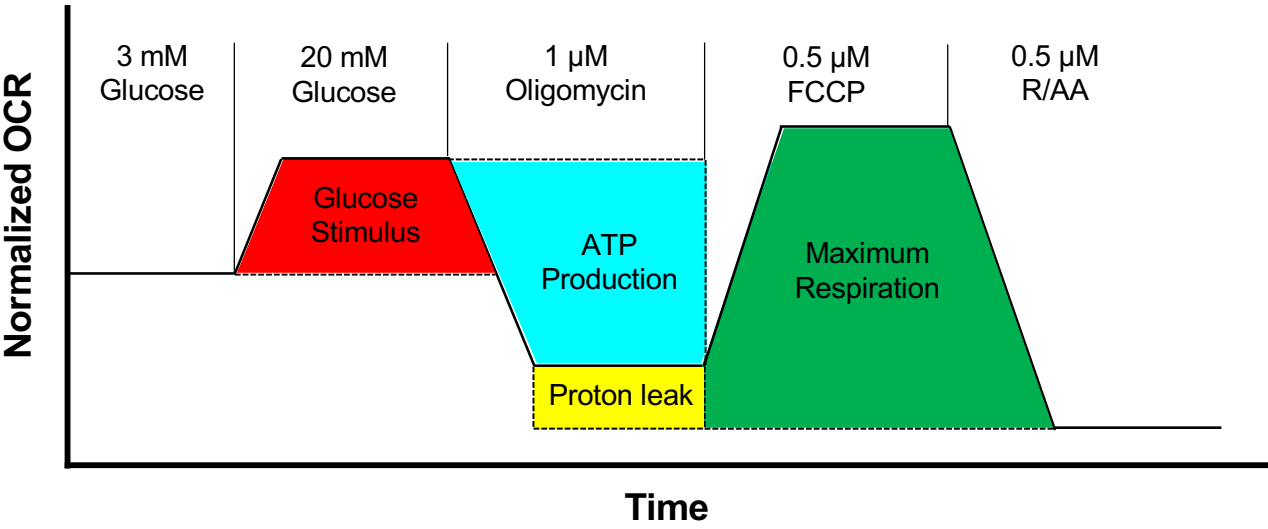

Supplementary Figure: 2

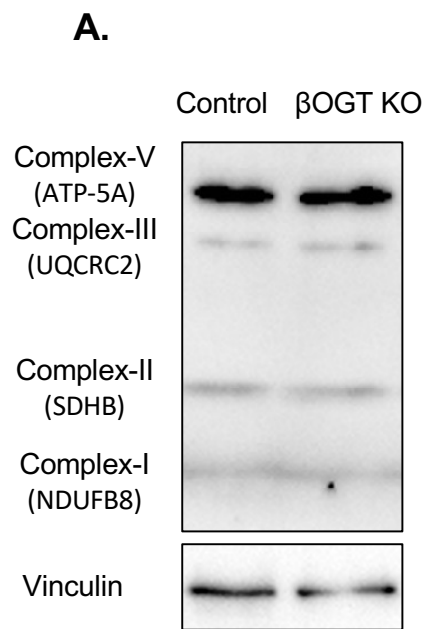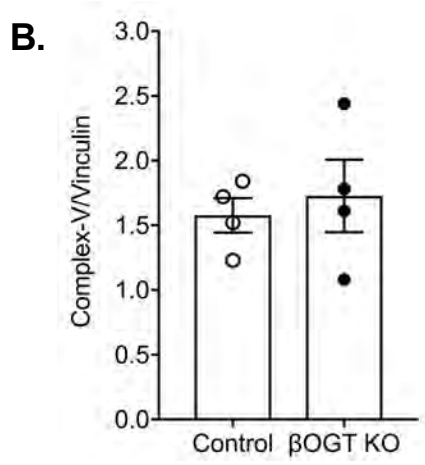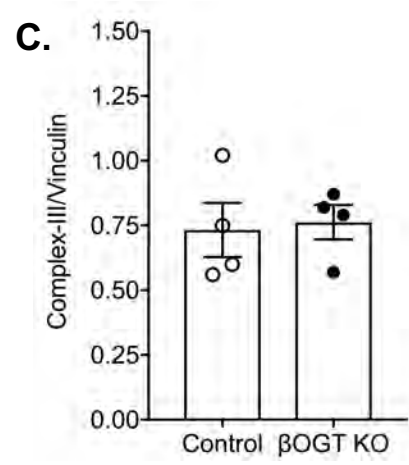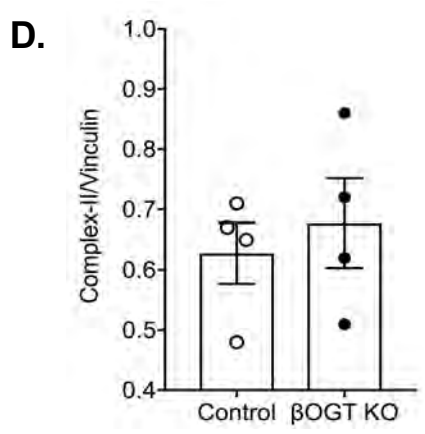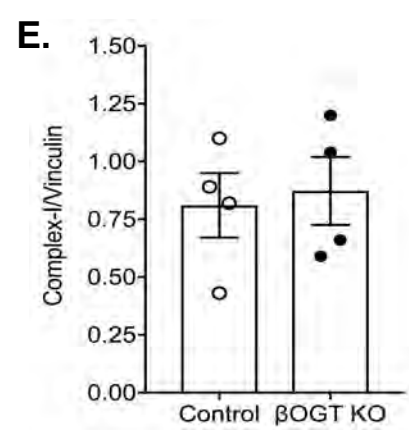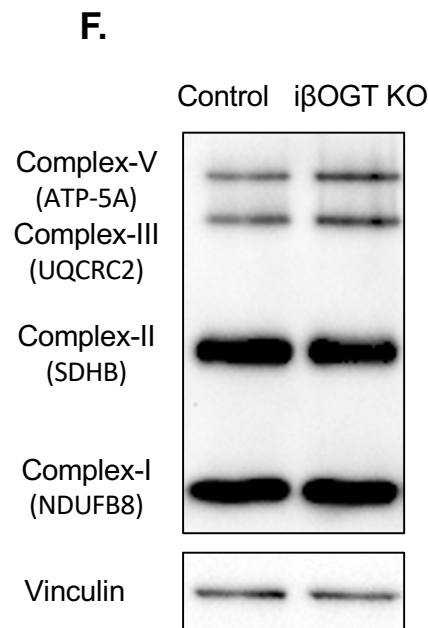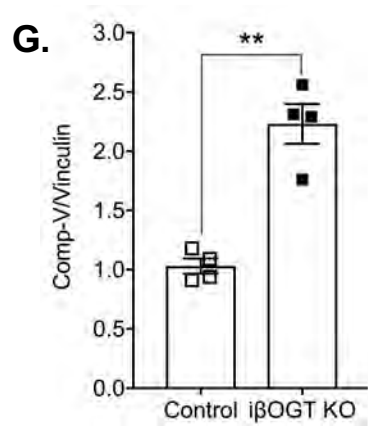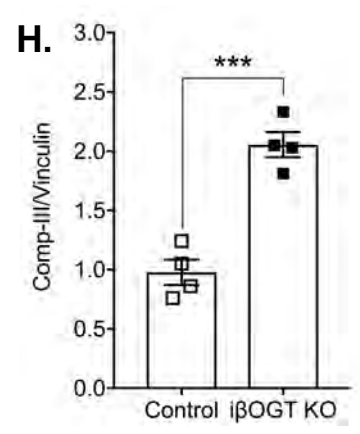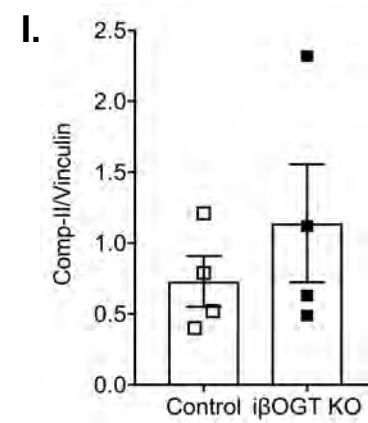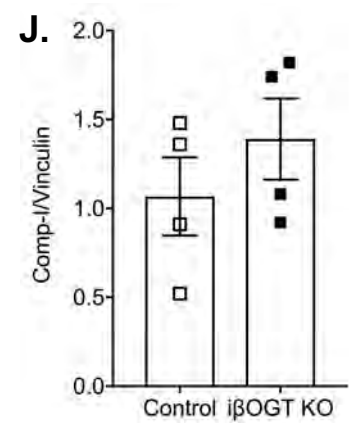

Supplementary Figure: 3

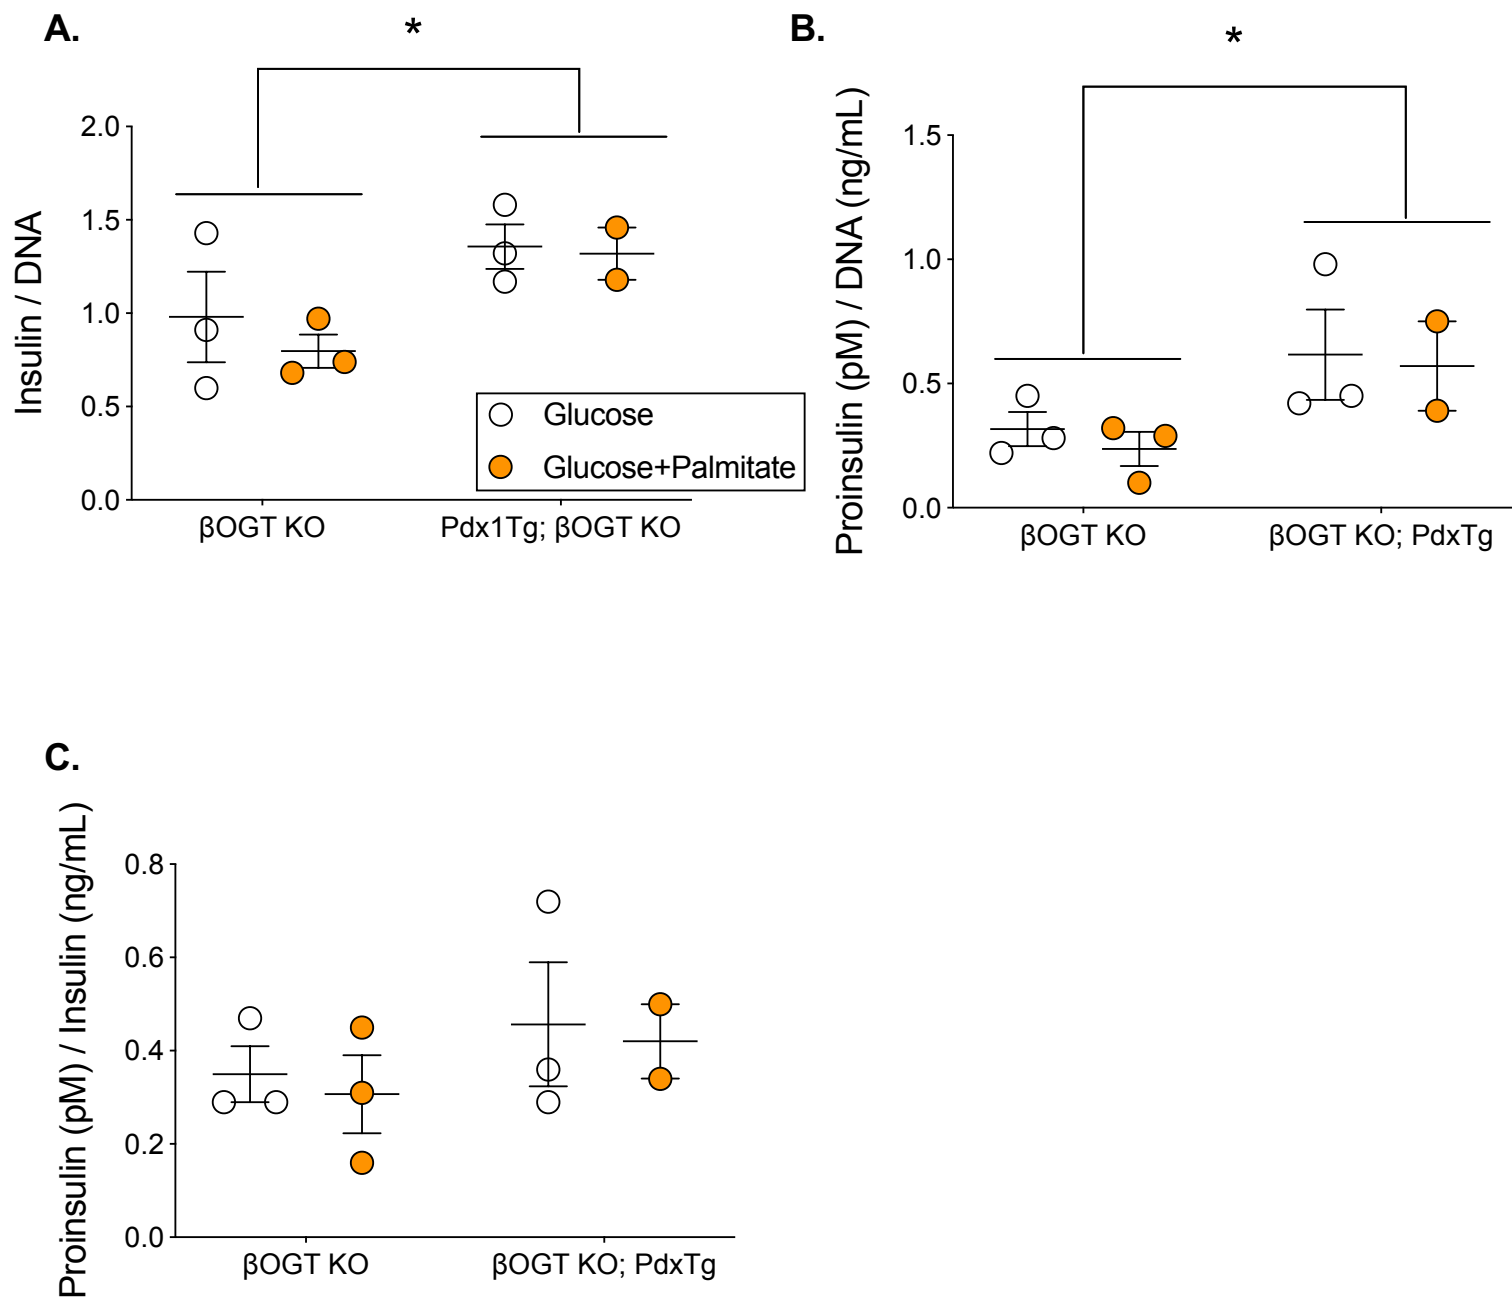

### **Supplementary Figure 1**

(A) The schematic diagram for analyzing glucose stimulation, ATP production, proton leak and maximum respiration, spare capacitance, basal respiration.

### **Supplementary Figure 2**

(A-J). Western blot analysis for Complex-V, IV,III and II between islet lysates from  $\beta$ OGTKO (A) i $\beta$ OGTKO (F) and respective littermate controls. Quantification of the blots are shown in B-E for  $\beta$ OGTKO and G-J for i $\beta$ OGTKO, n=4 and \*, p-value  $\leq 0.05$  vs.  $\beta$ OGTKO and control.

### **Supplementary Figure 3**

(A) Islet insulin content, normalized to DNA, is shown for both post-GSIS (glucose) and post-FASIS (glucose + palmitate) treated islets from  $\beta$ OGTKO mice (n=3 glucose, 3 glucose + palmitate) and Pdx1Tg;  $\beta$ OGTKO (n=3, 2). Data from the same islets was used for islet proinsulin content (B) and proinsulin/insulin ratio (C) as a measure of insulin processing capacity.
